# Supplementary material for: Anion-controlled conformational variation: Structural modulation and anion exchange of Ag(i) coordination networks
Source: Royal Society of Chemistry journal article supplement (doi:10.1039/c1ce06141k), 2011-12-21
Supplement: c1ce06141k.pdf [file c1ce06141k.pdf]

## Supplementary Information

### Anion-Controlled Conformational Variation: Structural Modulation and Anion Exchange of Ag(I) Coordination Networks

Wei Wei,<sup>a,b</sup> Hongtao Yu,<sup>a</sup> Feilong Jiang,<sup>b</sup> Bing Liu,<sup>a</sup> Jie Ma,<sup>a</sup> Maochun Hong<sup>\*,b</sup>

[a] Department of Chemistry, Capital Normal University, Beijing, 100037, P. R. China.

[b] State Key Laboratory of Structural Chemistry, Fujian Institute of Research on the Structure of Matter, Chinese Academy of Sciences, Fujian, Fuzhou, 350002, P. R. China.

Tel: 86-591-83792460; Fax: +86 591 / 8379 4946

E-mail: hmc@fjirsm.ac.cn.

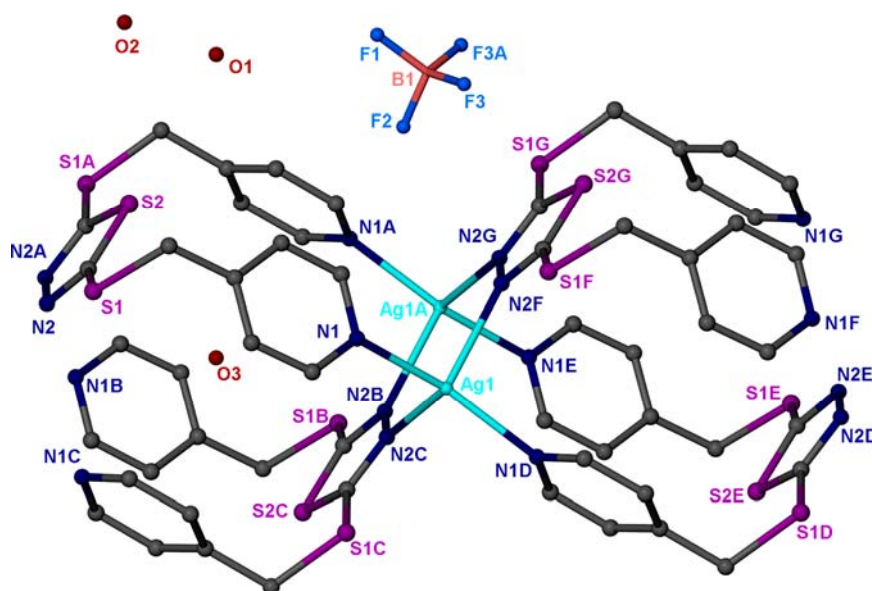

**Fig. S1.** The asymmetric unit and the silver (I) coordination environment in **1a**. Symmetry Code: A  $x, 1-y, z$ ; B  $-x, 1-y, -z$ ; C  $-x, y, -z$ ; D  $-x, -y, -z-1$ ; E  $-x, 1-y, -z-1$ ; F  $x, y, z-1$ ; G  $x, 1-y, z-1$ .

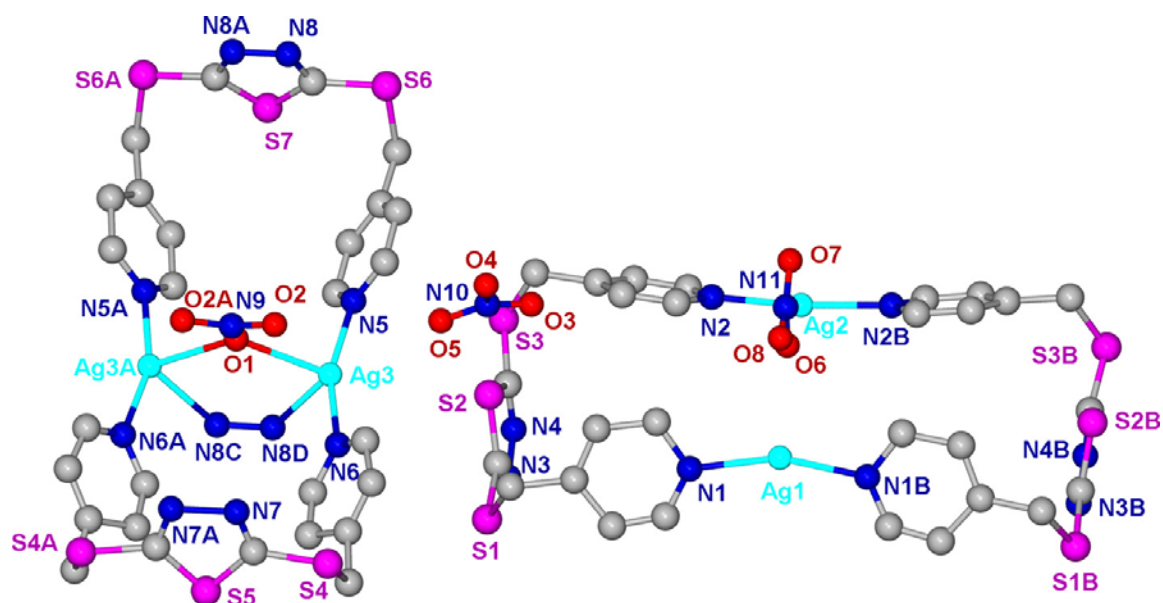

**Fig. S2.** The asymmetric unit and the silver (I) coordination environment in **2**. Symmetry Code: A 1-x, y, z; B 2-x, y, z; C 1-x, 1-y, 1/2+z; D x, 1-y, 1/2+z.

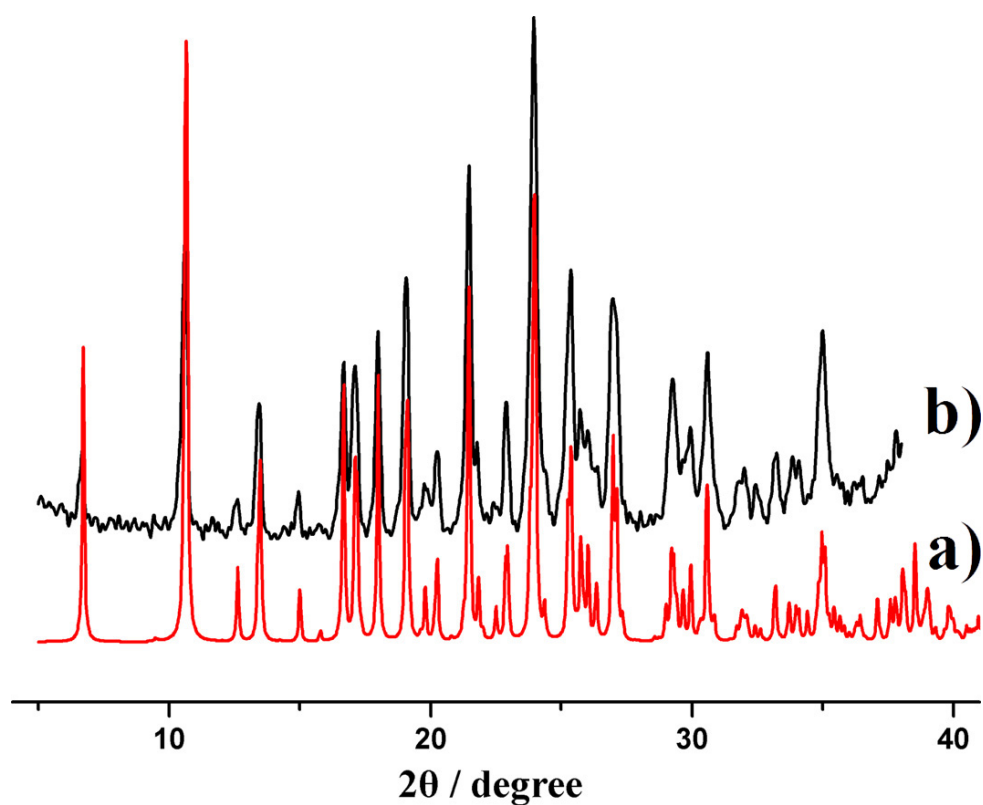

**Fig. S3.** X-ray powder diffraction patterns of **2**: a) **2** simulated, b) **2** measured.

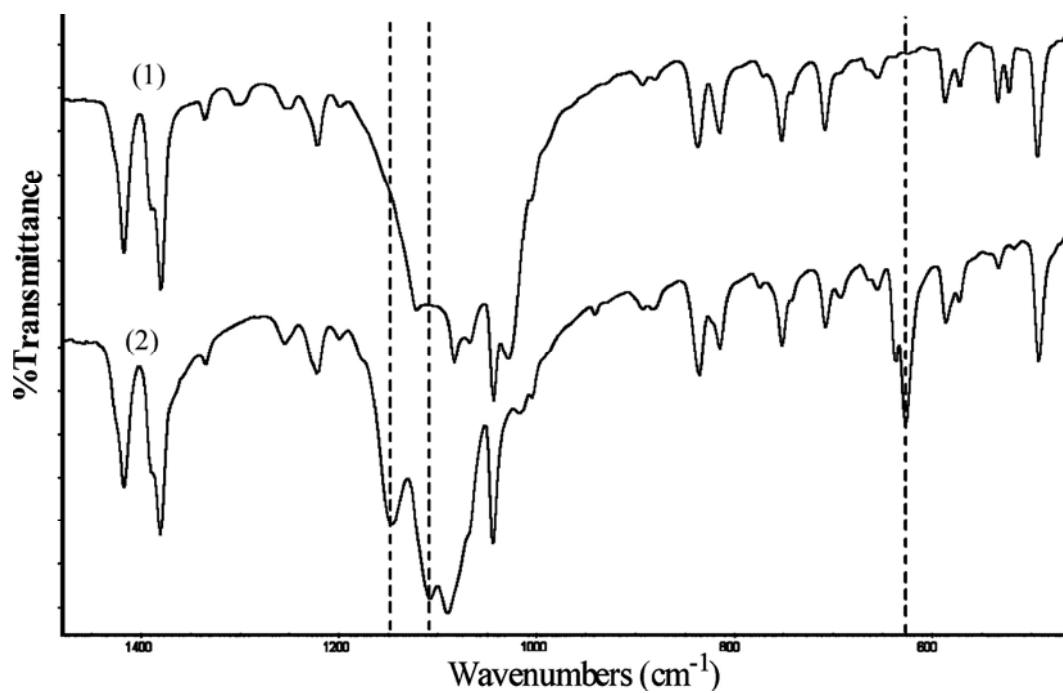

**Fig. S4.** IR (KBr pellet) change procedure during the counteranion exchange of **1a** (1) with  $\text{NH}_4\text{ClO}_4$  after 24 h (2) at 60 °C.

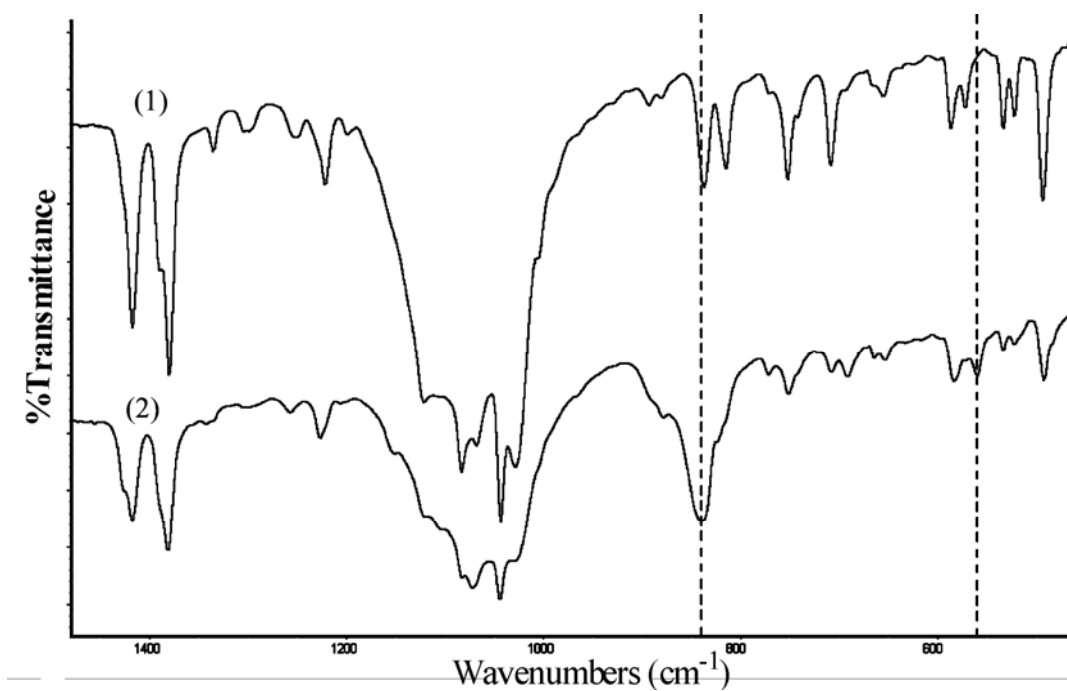

**Fig. S5.** IR (KBr pellet) change procedure during the counteranion exchange of **1a** (1) with  $\text{NH}_4\text{PF}_6$  after 24 h (2) at 60 °C.

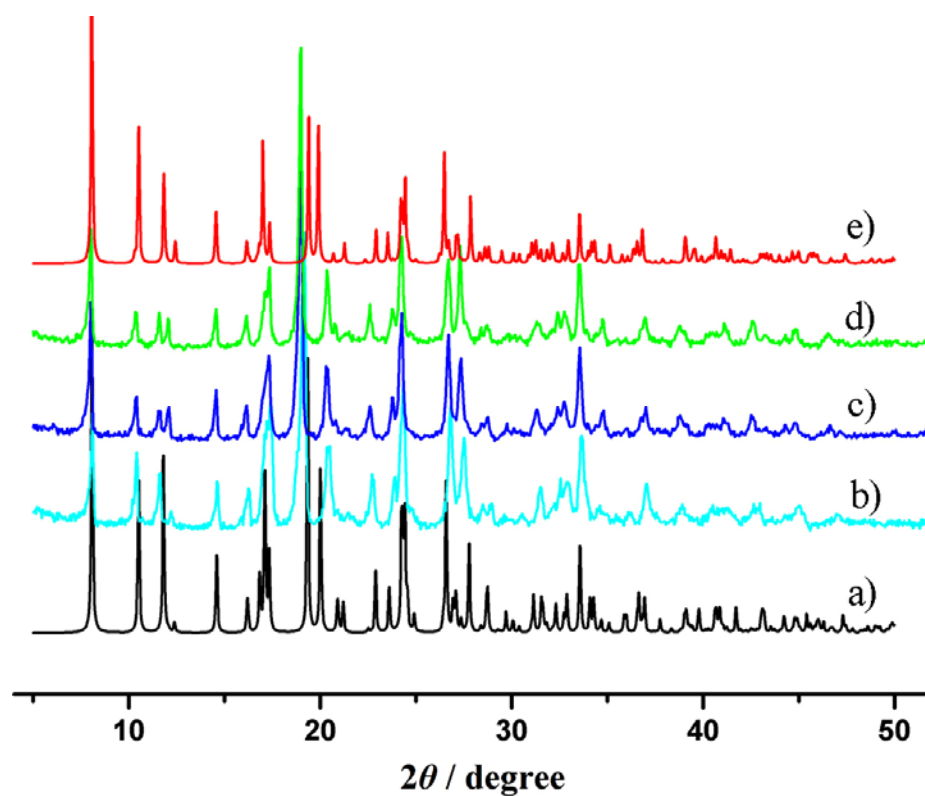

**Fig. S6.** X-ray powder diffraction patterns of the solid after anion-exchange: a) **1** simulated, b) **1** with  $\text{NH}_4\text{PF}_6$ , c) **1a** with  $\text{NH}_4\text{PF}_6$ , d) **1a** with  $\text{NaClO}_4$  and e) **1a** simulated.

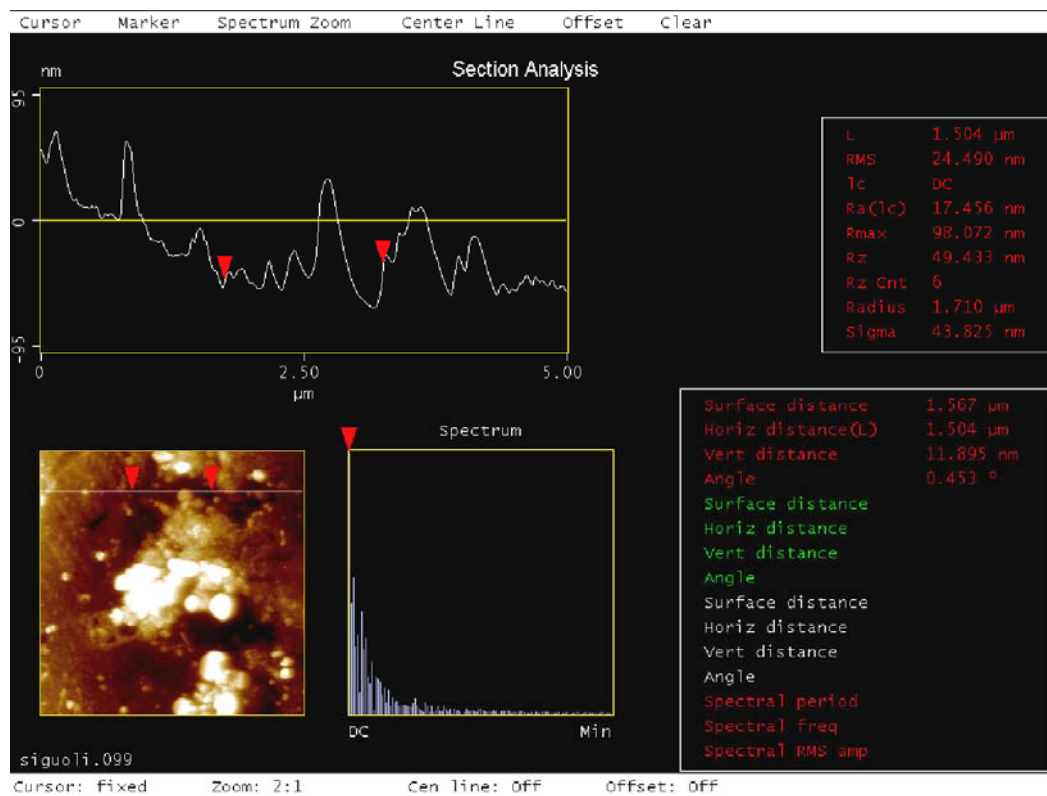

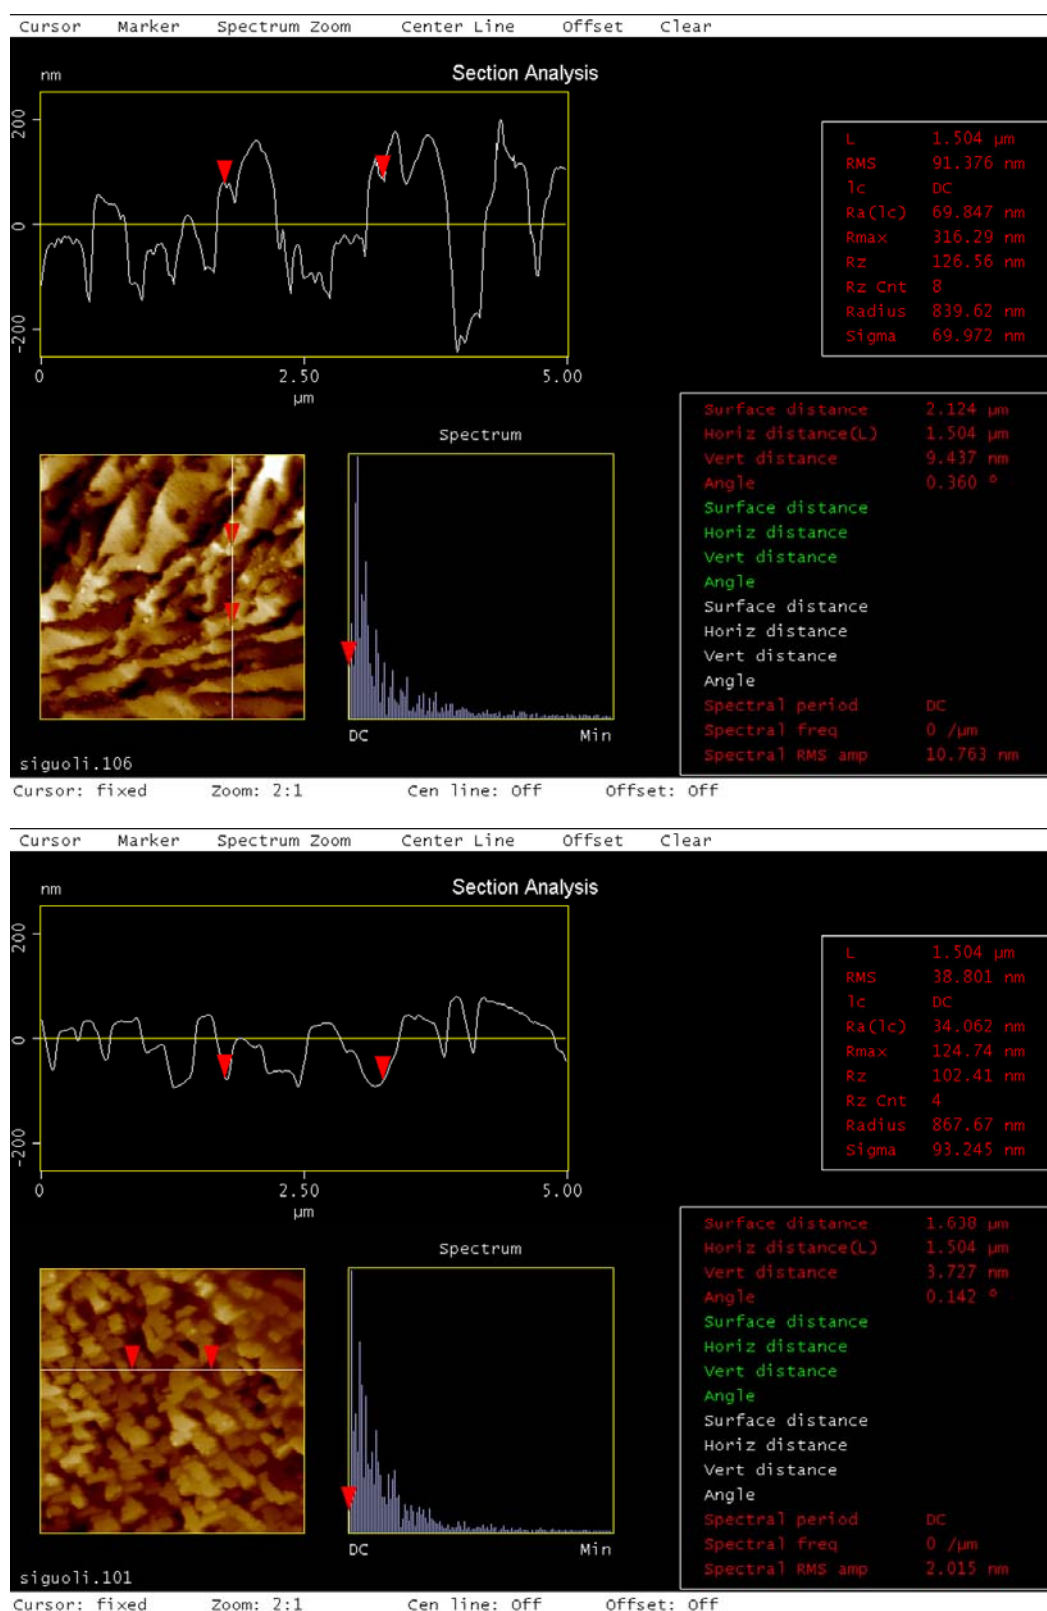

**Fig. S7.** AFM images of the surface of a crystal of **1**: before anion exchange (top); 15 min after addition of  $\text{NaNO}_2$  solution (0.1 M) (middle); 5 h after addition of  $\text{NaNO}_2$  solution (0.1 M) (bottom).
